# Supplementary material
Source: PubMed Central journal article supplement (PMC3997377)
Supplement: supp_dyu026_dyu026-suppl_data.pdf [file supp_dyu026_dyu026-suppl_data.pdf]

## Appendix

### *Numerical example of Berkson's fallacy*

Here we provide a numerical example of Berkson's fallacy. Table 1 below shows one of the theoretical layout and probabilities from one of the original examples worked out by Berkson.<sup>1</sup> The study assesses the association between cholecystic disease and diabetes mellitus. Controls are subjects with ophthalmologic refractive errors. The example is constructed so that the three diseases are independent in the population.

With a source population of 10,000,000 subjects, the following two-by-two tables (Table 2a-2c) can be constructed based on the numbers in Table 1, assuming independent hospitalization probabilities. Furthermore, it is assumed that subjects with both the case and control disease are counted (only) as cases. Berkson uses as measure of association the case-control difference in the "incidence" of D1 (actually these were prevalences), but the particular choice of association measure is irrelevant for our exposition (we use odds ratios in our worked out examples, following Boyd). For details about the calculations we refer to the papers of Berkson and Boyd.<sup>1,4</sup> It follows that the odds ratio for the association between cholecystic disease and diabetes is 1 in the total population (by definition), 1.89 among hospitalized subjects and again 1 in subjects out of the hospital.

### *Magnitude and direction of Berkson's fallacy*

The example above can be extended to general formulas to calculate the relative magnitude of Berkson's fallacy. The formula's have been derived by Boyd.<sup>4</sup>

Let  $p_1$ ,  $p_2$  and  $p_3$  denote the prevalence of diseases D1, D2, and D3, respectively. In Berkson's scenario  $p_1$ ,  $p_2$  and  $p_3$  are independent and thus the D1-D2 odds ratio in the source population is 1. Let  $h_1$ ,  $h_2$  and  $h_3$  denote the probability of hospitalization of diseases D1, D2, and D3, respectively. It is assumed that the hospitalization probabilities are also independent. When subjects with both the case and control disease are counted as cases, as Berkson did, the D1-D2 odds ratio indicating the magnitude of the fallacy in the hospitalized population equals:

$$OR = \frac{[1 - (1 - h_1)(1 - h_2)(1 - p_3 h_3)]h_3}{[h_2 + (1 - h_2)p_3 h_3](h_3 + h_1 - h_3 h_1)} \quad (\text{Equation 1})$$

When subjects who have both the case and control disease are excluded, the magnitude of the fallacy depends only on the three hospitalization probabilities:

$$OR = \frac{[h_2 + h_1(1 - h_2)]h_3}{[h_3 + h_1(1 - h_3)]h_2} \quad (\text{Equation 2})$$

These equations lead to some additional observations:<sup>4,10</sup>

- 1) Given a low prevalence of the control disease (in case of overlap between cases and controls, equation 1), Berkson's fallacy is negative when  $h_2 > h_3$ , and positive when  $h_3 > h_2$ .

- 2) The lower  $h_1$ , the smaller the bias will be. When the exposure does not lead to hospitalization at all ( $h_1=0$ ), these formulas simplify to 1. In terms of graph theory, hospitalization is no longer a collider of exposure and outcome because there is no arrow from D1 to H.

Those relationships have been illustrated with some numeric examples in Table 3. The first row represents Berkson's original example also mentioned above. When the odds ratio in the source population does not equal 1, the in-hospital odds ratio is the product of the population odds ratio and odds ratio due to Berkson's fallacy following the above formulas.

These formulas apply only to Berkson's setting in which diseases lead to hospitalization through independent mechanisms. In all other scenarios, e.g. clinical decisions to hospitalize because of the presence of multiple diseases, there is additional bias, beyond the fallacy as quantified in the formulas (see text).

#### *Magnitude of the indirect Berkson's fallacy*

Similar formulas and rules-of-thumb apply to indirect Berkson's fallacy in exposure-disease associations as to the classical Berkson's fallacy in disease-disease associations, although in the equations all hospitalization probabilities of D1 ( $h_1$ ) should be changed into the hospitalization probability of subjects with the exposure E (via D1). As not all exposed subjects will have this other disease D1, the magnitude of indirect Berkson's fallacy in will be generally lower than the classical Berkson's fallacy.

## Appendix Tables

*Table 1: Original example of Berkson's fallacy: prevalence and hospitalization probabilities*

|           |          | Population prevalence |             | Hospitalization probability |             | Working example       |
|-----------|----------|-----------------------|-------------|-----------------------------|-------------|-----------------------|
| Disease 1 | Exposure | p1                    | <b>0.03</b> | h1                          | <b>0.15</b> | (Cholecystic disease) |
| Disease 2 | Cases    | p2                    | <b>0.01</b> | h2                          | <b>0.05</b> | (Diabetes mellitus)   |
| Disease 3 | Controls | p3                    | <b>0.1</b>  | h3                          | <b>0.2</b>  | (Refractive errors)   |

In Berkson's example, Exposure (D1) was cholecystic disease; Case (D2) was diabetes, and Control (D3) was ophthalmologic refractive disorders.

*Table 2a: Association in the overall population*

|                 | Exposed | Unexposed |           |
|-----------------|---------|-----------|-----------|
| <b>Cases</b>    | 3.000   | 97.000    | 100.000   |
| <b>Controls</b> | 29.700  | 960.300   | 990.000   |
|                 | 32.700  | 1.057.300 | 1.090.000 |

Association with cholecystic disease in the overall population.; the odds ratio is 1.

*Table 2b: Association in the hospitalized population*

|                 | Exposed | Unexposed |         |
|-----------------|---------|-----------|---------|
| <b>Cases</b>    | 626     | 6.693     | 7.319   |
| <b>Controls</b> | 9.504   | 192.060   | 201.564 |
|                 | 10.130  | 198.753   | 208.883 |

Association with cholecystic disease in the hospitalized population; the odds ratio is 1.89.

*Table 2c: Association in the non-hospitalized population*

|                 | Exposed | Unexposed |         |
|-----------------|---------|-----------|---------|
| <b>Cases</b>    | 2.374   | 90.307    | 92.681  |
| <b>Controls</b> | 20.196  | 768.240   | 788.436 |
|                 | 22.570  | 858.547   | 881.117 |

Association with cholecystic disease in the non-hospitalized population. The odds ratio is 1.

Table 3: Examples of the magnitude of classical Berkson's fallacy with varying hospitalization probabilities

| $h_1$ | $h_2$ | $h_3$ | $p_3$ | OR <sub>1</sub> | OR <sub>2</sub> |
|-------|-------|-------|-------|-----------------|-----------------|
| 0.15  | 0.05  | 0.2   | 0.1   | 1.89            | 2.41            |
| 0.01  | 0.05  | 0.2   | 0.1   | 1.09            | 1.14            |
| 0     | 0.05  | 0.2   | 0.1   | 1.00            | 1.00            |
| 0.15  | 0.2   | 0.05  | 0.1   | 0.41            | 0.42            |
| 0.01  | 0.2   | 0.05  | 0.1   | 0.87            | 0.87            |
| 0     | 0.2   | 0.05  | 0.1   | 1.00            | 1.00            |
| 0.15  | 0.2   | 0.2   | 0.1   | 0.97            | 1.00            |
| 0.15  | 0.05  | 0.05  | 0.1   | 0.93            | 1.00            |

$h_1$ ,  $h_2$  and  $h_3$  are the hospitalization probabilities of the “exposure” disease (D1), the case disease (D2) and the control disease (D3), which are independent. All calculations assume a prevalence of the control disease of 0.1. The odds ratios (OR) indicate the magnitude of the spurious association that arises by Berkson's fallacy, assuming a causal OR of 1. The first OR represents the fallacy in the situation in which patients who have both the case and the control disease are counted (only) as cases (Equation 1); the second OR follows when those patients with both diseases are excluded (Equation 2). The first row shows Berkson's original example.
